# Supplementary material for: A nanoscale study of the structure and electrical response of Sepia eumelanin
Source: Royal Society of Chemistry journal article supplement (doi:10.1039/d3na00355h), 2023-01-01
Supplement: d3na00355h1.pdf [file d3na00355h1.pdf]

## Supplementary Information (SI)

### A nanoscale study of the structure and electrical response of *Sepia eumelanin*

Dieudonné Niyonkuru,<sup>a#</sup> Anthony Camus,<sup>a#</sup> Manuel Reali,<sup>a</sup> Zhaojing Gao,<sup>a</sup> Daniel M Shadrack,<sup>b</sup> Oleg Butyaev,<sup>c</sup> Marko Surtchev,<sup>c#</sup> and Clara Santato<sup>a\*</sup>

<sup>a</sup> Department of Engineering Physics, Polytechnique Montreal, C.P. 6079, Succ. Centre-Ville, Montreal, QC, H3C 3A7, Canada.

<sup>b</sup> Department of Chemistry, St. John's University of Tanzania, P.O. Box 47, Dodoma, Tanzania.

<sup>c</sup> NT-MDT Spectrum Instruments Inc., 5861 S Kyrene Rd 19, Tempe, AZ 85283, USA.

# These Authors equally participated in the work.

\*Corresponding author: [clara.santato@polymtl.ca](mailto:clara.santato@polymtl.ca)

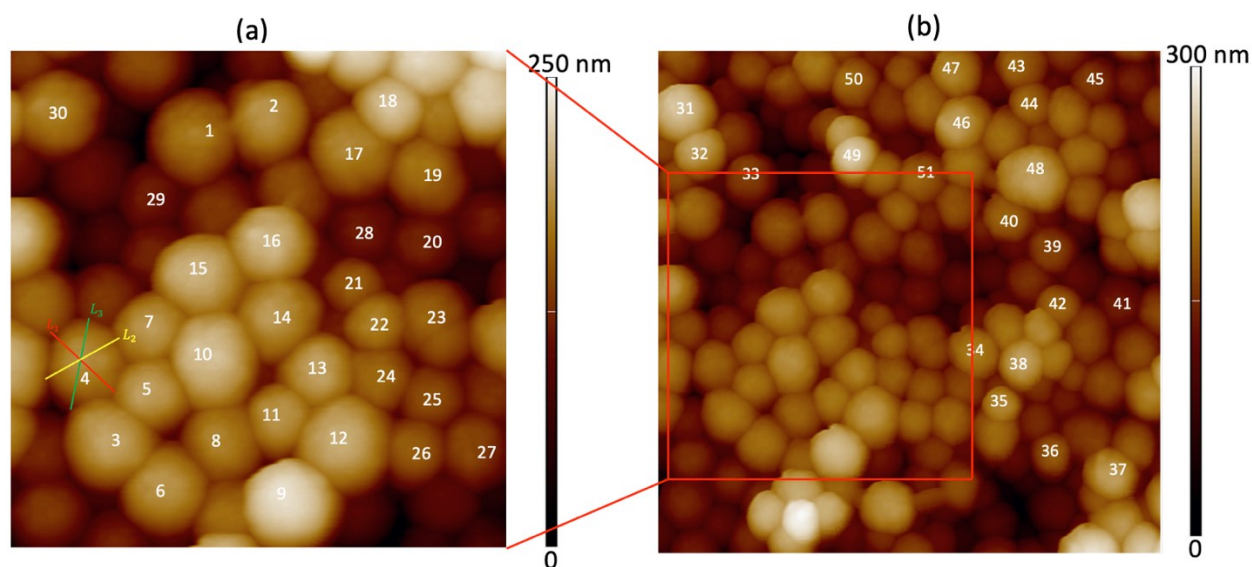

**Figure S1.** (a) 1.2 μm x 1.2 μm- and (b) 2 μm x 2 μm-sized AFM images of drop casted *Sepia* showing 50 granules over which granule diameters and protrusions' sizes (height and width) were measured. Lines L<sub>1</sub>, L<sub>2</sub>, and L<sub>3</sub> indicate the directions in which diameter values were measured for granule 4. See Table S2 for the diameters. See Table S3 for protrusions' sizes.

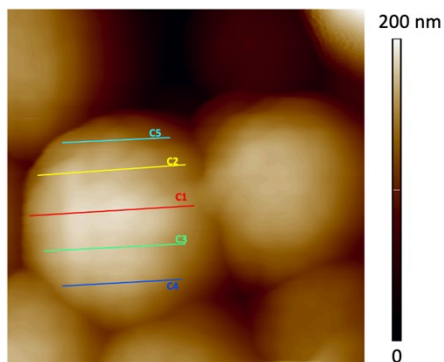

**Figure S2.** Lines considered to measure protrusions size on granule 1 (see Figure S1).

#### Calculations of the size of the protrusions

In Figure 4 (b), the radius of the circle containing the fitting data is 123.6 nm. The center of this semicircle is at (881.7, - 646.7) nm.

The height of Protrusion 1 is calculated by considering the distance from the highest point of the protrusion to the center of the circle minus the radius:

$$\sqrt{(490.4 - 881.7)^2 + (590.8 - (-646.7))^2} - 123.6 = 6.2 \text{ nm}$$

Along this line, the height of Protrusion 2 is:

$$\sqrt{(965.3 - 881.7)^2 + (624.8 - (-646.7))^2} - 123.63 = 3.8 \text{ nm}$$

The width of the protrusions was measured as the full width at half maximum (FWHM), for each protrusion.

The width of Protrusion 1 is therefore  $\text{width}_1 = \text{FWHM}_1 = 23.3 \text{ nm}$

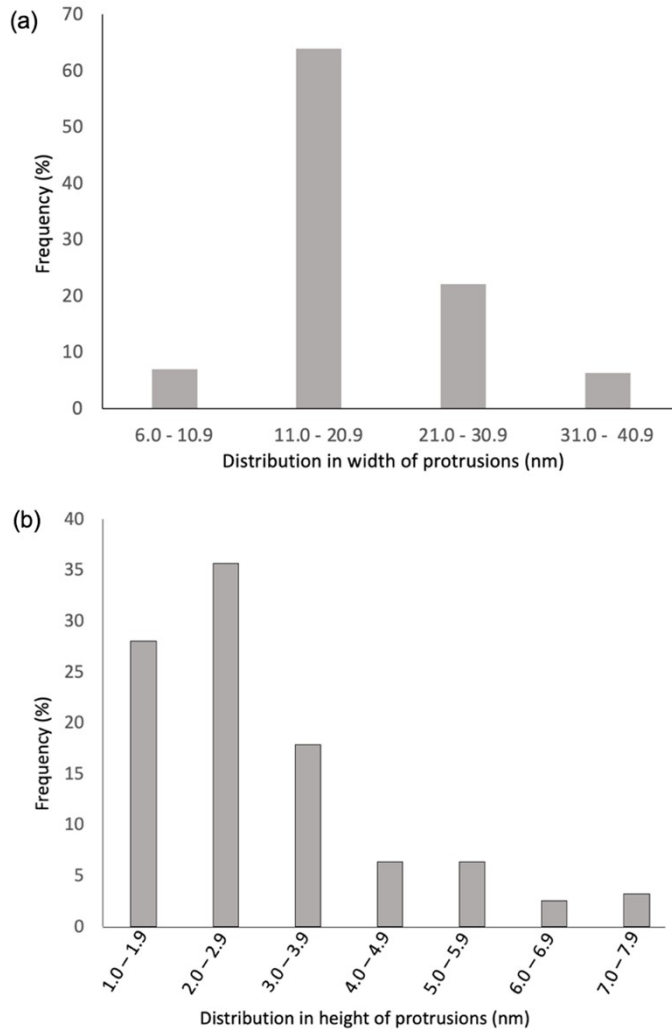

**Figure S3.** Histograms of distribution in (a) width and (b) height of protrusions of *Sepia eumelanin* granules from Table S3.

**Table S1.** Characteristics of the samples measured by AFM for this study.

| Sample   | AFM characterization | Deposition method                           | Scanned area                                                                                                                         | Figure                                                |
|----------|----------------------|---------------------------------------------|--------------------------------------------------------------------------------------------------------------------------------------|-------------------------------------------------------|
| Sample 1 | AFM<br>(Topography)  | Spin coating<br>(Sepia eumelanin-PVB ink)   | 2.5 $\mu\text{m}$ x 2.5 $\mu\text{m}$<br>1 $\mu\text{m}$ x 1 $\mu\text{m}$<br>600 nm x 600 nm                                        | -                                                     |
| Sample 2 |                      | Spin coating<br>(Sepia eumelanin-PVB ink)   | 700 nm x 700 nm<br>700 nm x 700 nm                                                                                                   | -                                                     |
| Sample 3 |                      | Spin coating<br>(Sepia eumelanin-PVB ink)   | 3 $\mu\text{m}$ x 3 $\mu\text{m}$<br>1 $\mu\text{m}$ x 1 $\mu\text{m}$                                                               | Figure 5. (a)<br>Figure 5. (b)                        |
| Sample 4 |                      | Spin coating<br>(Sepia eumelanin-PVB ink)   | 20 $\mu\text{m}$ x 20 $\mu\text{m}$<br>5 $\mu\text{m}$ x 5 $\mu\text{m}$<br>1.5 $\mu\text{m}$ x 1.5 $\mu\text{m}$<br>700 nm x 700 nm | -                                                     |
| Sample 5 |                      | Spin coating<br>(Sepia eumelanin-PVB ink)   | 20 $\mu\text{m}$ x 20 $\mu\text{m}$<br>5 $\mu\text{m}$ x 5 $\mu\text{m}$                                                             | -                                                     |
| Sample 6 |                      | Spin coating<br>(Sepia eumelanin-PVB ink)   | 2 $\mu\text{m}$ x 2 $\mu\text{m}$<br>500 nm x 500 nm                                                                                 | -                                                     |
| Sample 7 |                      | Drop casting<br>(Extracted Sepia eumelanin) | 2 $\mu\text{m}$ x 2 $\mu\text{m}$<br>1.2 $\mu\text{m}$ x 1.2 $\mu\text{m}$<br>400 nm x 400 nm                                        | Figure S1. (b) (SI)<br>Figure 2. (a)<br>Figure 2. (b) |
| Sample 1 | c-AFM                | Spin coating<br>(Sepia eumelanin-PVB ink)   | 2.5 $\mu\text{m}$ x 2.5 $\mu\text{m}$<br>1 $\mu\text{m}$ x 1 $\mu\text{m}$<br>600 nm x 600 nm                                        | -                                                     |
| Sample 2 |                      | Spin coating<br>(Sepia eumelanin-PVB ink)   | 700 nm x 700 nm<br>700 nm x 700 nm                                                                                                   | -                                                     |
| Sample 3 |                      | Spin coating<br>(Sepia eumelanin-PVB ink)   | 1 $\mu\text{m}$ x 1 $\mu\text{m}$                                                                                                    | Figure 5. (b)                                         |

**Table S2.** Diameters of granules measured from drop cast Sepia eumelanin. The average is calculated over granules with size in the considered interval.

| Range of measured Granules' diameters (nm) | Average diameter of granules (nm) | Frequency (%) |
|--------------------------------------------|-----------------------------------|---------------|
| 120 - 129                                  | 122 $\pm$ 4                       | 2             |
| 140 - 149                                  | 143 $\pm$ 4                       | 2             |
| 150 - 159                                  | 155 $\pm$ 7                       | 12            |
| 160 - 169                                  | 166 $\pm$ 6                       | 4             |
| 170 - 179                                  | 177 $\pm$ 12                      | 8             |
| 180 - 189                                  | 183 $\pm$ 7                       | 4             |
| 190 - 199                                  | 194 $\pm$ 4                       | 6             |
| 200 - 209                                  | 204 $\pm$ 11                      | 20            |
| 210 - 219                                  | 216 $\pm$ 7                       | 10            |
| 220 - 229                                  | 223 $\pm$ 16                      | 14            |
| 230 - 239                                  | 232 $\pm$ 12                      | 6             |
| 240 - 249                                  | 244 $\pm$ 11                      | 6             |
| 250 - 259                                  | 257 $\pm$ 12                      | 4             |
| 290 - 300                                  | 291 $\pm$ 10                      | 2             |

**Table S3.** Height and width of protrusions characterizing the surface morphology of *Sepia eumelanin* granules indicated in Figure S1.

| Granule number | Profile's line and associated protrusions | Height (nm)  | Width (nm) |      |
|----------------|-------------------------------------------|--------------|------------|------|
| 1              | C1G1                                      | Protrusion 1 | 6.2        | 23.3 |
|                |                                           | Protrusion 2 | 3.8        | 18.9 |
|                | C2G1                                      | Protrusion 1 | 2.9        | 21.3 |
|                |                                           | Protrusion 2 | 6.9        | 25.2 |
|                |                                           | Protrusion 3 | 9.3        | 29   |
|                | C3G1                                      | Protrusion 1 | 4.7        | 21.6 |
|                | C4G1                                      | Protrusion 2 | 4.9        | 26.7 |
|                |                                           | Protrusion 3 | 3.8        | 20   |
|                | C5G1                                      | Protrusion 1 | 5.7        | 26.7 |
|                |                                           | Protrusion 2 | 1.6        | 9.4  |
| Protrusion 3   |                                           | 2.4          | 15.6       |      |
| 2              | C1G2                                      | Protrusion 1 | 2.7        | 11.7 |
|                |                                           | Protrusion 2 | 1.9        | 10.1 |
|                | C2G2                                      | Protrusion 1 | 1.1        | 6.1  |
|                |                                           | Protrusion 2 | 1.6        | 11.5 |
|                | C3G2                                      | Protrusion 1 | 1.4        | 9.8  |
|                |                                           | Protrusion 2 | 2.6        | 17.7 |
|                | C4G2                                      | Protrusion 1 | 2.5        | 14.8 |
|                |                                           | Protrusion 2 | 2.6        | 20.5 |
| 3              | C1G3                                      | Protrusion 1 | 5          | 18   |
|                |                                           | Protrusion 2 | 3.2        | 18.5 |
|                |                                           | Protrusion 3 | 3.5        | 20.3 |
|                | C2G3                                      | Protrusion 1 | 3.2        | 29.3 |
|                |                                           | Protrusion 2 | 3.3        | 21.1 |
|                |                                           | Protrusion 3 | 2.6        | 16.5 |
|                | C3G3                                      | Protrusion 1 | 3.1        | 28.7 |
|                |                                           | Protrusion 2 | 3.3        | 22.8 |
|                |                                           | Protrusion 3 | 2.4        | 17.8 |
| 4              | C1G4                                      | Protrusion 1 | 2.7        | 18.8 |
|                |                                           | Protrusion 2 | 5.4        | 26.9 |
|                | C2G4                                      | Protrusion 1 | 7.8        | 31.3 |
|                |                                           | Protrusion 2 | 6.7        | 36.2 |
|                |                                           | Protrusion 3 | 1.8        | 7.8  |
| 5              | C1G5                                      | Protrusion 1 | 2.6        | 14.7 |
|                |                                           | Protrusion 2 | 3.6        | 23.5 |
|                | C2G5                                      | Protrusion 1 | 2.5        | 14.2 |
|                |                                           | Protrusion 2 | 1.3        | 11   |
|                | C3G5                                      | Protrusion 1 | 6.9        | 17.5 |
| Protrusion 2   |                                           | 1.2          | 12.7       |      |
| 6              | C1G6                                      | Protrusion 1 | 4.8        | 22.7 |
|                |                                           | Protrusion 2 | 1.6        | 15.5 |
|                | C2G6                                      | Protrusion 1 | 3.4        | 17.4 |
|                |                                           | Protrusion 2 | 2          | 15.4 |
|                | C3G6                                      | Protrusion 1 | 3.8        | 26.3 |
|                |                                           | Protrusion 2 | 3.8        | 15.3 |
|                |                                           | Protrusion 3 | 2          | 10.2 |
| 7              | C1G7                                      | Protrusion 1 | 1.7        | 14.1 |
|                | C2G7                                      | Protrusion 1 | 1.2        | 13.3 |
|                |                                           | Protrusion 2 | 3.2        | 14.9 |
|                | C3G7                                      | Protrusion 1 | 2.2        | 17.6 |
|                |                                           | Protrusion 2 | 1.2        | 15.7 |
| 8              | C1G8                                      | Protrusion 1 | 2.3        | 14   |

|              |              |              |      |      |
|--------------|--------------|--------------|------|------|
|              |              | Protrusion 2 | 1.9  | 13.6 |
|              | C2G8         | Protrusion 1 | 3.8  | 16.8 |
|              | C3G8         | Protrusion 1 | 3    | 16.2 |
| Protrusion 2 |              | 2.5          | 16.4 |      |
| 9            | C1G9         | Protrusion 1 | 2    | 17.4 |
|              |              | Protrusion 2 | 3    | 18.6 |
|              | C2G9         | Protrusion 1 | 2.5  | 16   |
|              |              | Protrusion 2 | 2.6  | 15.8 |
|              | C3G9         | Protrusion 1 | 1.4  | 12.7 |
|              |              | Protrusion 2 | 2.5  | 19.3 |
| Protrusion 3 |              | 2            | 17.8 |      |
| 10           | C1G10        | Protrusion 1 | 4.9  | 30   |
|              |              | Protrusion 2 | 1.8  | 11.1 |
|              | C2G10        | Protrusion 1 | 2.1  | 13.4 |
|              |              | Protrusion 2 | 1.7  | 11.7 |
|              |              | Protrusion 3 | 3.6  | 28   |
|              | C3G10        | Protrusion 1 | 3.2  | 17.6 |
| Protrusion 2 |              | 5.3          | 22.8 |      |
| Protrusion 3 |              | 3.3          | 17.8 |      |
| 11           | C1G11        | Protrusion 1 | 5.8  | 31.9 |
|              |              | Protrusion 2 | 2.3  | 17.3 |
|              | C2G11        | Protrusion 1 | 1.9  | 20.2 |
|              | C3G11        | Protrusion 1 | 2.2  | 22.7 |
| 12           | C1G12        | Protrusion 1 | 2.8  | 17.9 |
|              |              | Protrusion 2 | 2.8  | 37.7 |
|              | C2G12        | Protrusion 1 | 2.7  | 23.5 |
|              |              | Protrusion 2 | 1.2  | 16.3 |
|              |              | Protrusion 3 | 4    | 17.8 |
|              | C3G12        | Protrusion 1 | 2.8  | 18   |
| Protrusion 2 |              | 1.6          | 12.6 |      |
| 13           | C1G13        | Protrusion 1 | 3.3  | 19.8 |
|              |              | Protrusion 2 | 2.9  | 7.9  |
|              |              | Protrusion 3 | 2.8  | 26.6 |
|              | C2G13        | Protrusion 1 | 2.8  | 17.8 |
|              |              | Protrusion 2 | 4.3  | 22.6 |
| 14           | C1G14        | Protrusion 1 | 4.9  | 32.5 |
|              |              | Protrusion 2 | 2.8  | 17.6 |
|              |              | Protrusion 3 | 1.6  | 17.9 |
|              | C2G14        | Protrusion 1 | 2.2  | 15.6 |
|              |              | Protrusion 2 | 1.1  | 11.4 |
|              | C3G14        | Protrusion 1 | 2    | 15.4 |
| C4G14        | Protrusion 1 | 1.2          | 10.3 |      |
| 15           | C1G15        | Protrusion 1 | 1.1  | 9.3  |
|              |              | Protrusion 2 | 2.8  | 19.2 |
|              |              | Protrusion 3 | 1.3  | 15.5 |
|              | C2G15        | Protrusion 1 | 1.5  | 16   |
|              |              | Protrusion 2 | 1.1  | 12.4 |
|              | C3G15        | Protrusion 3 | 2.5  | 25   |
|              |              | Protrusion 2 | 2.4  | 22.3 |
|              | C4G15        | Protrusion 1 | 2.8  | 20.2 |
|              | C5G15        | Protrusion 1 | 1    | 11.1 |
| Protrusion 2 |              | 1.9          | 25.7 |      |
| 16           | C1G16        | Protrusion 1 | 2    | 11.5 |
|              |              | Protrusion 2 | 1    | 13.8 |
|              | C2G16        | Protrusion 1 | 2.7  | 19.8 |
|              |              | Protrusion 2 | 5.1  | 27.6 |

|              |       |              |              |      |
|--------------|-------|--------------|--------------|------|
| 17           | C1G17 | Protrusion 1 | 3.9          | 18   |
|              |       | Protrusion 2 | 5            | 21.6 |
|              |       | Protrusion 3 | 1.4          | 11.7 |
|              | C2G17 | Protrusion 1 | 7            | 40.1 |
|              |       | Protrusion 2 | 3.2          | 21.9 |
|              | C3G17 | Protrusion 1 | 2.4          | 11.6 |
| Protrusion 2 |       | 2.3          | 15.9         |      |
| Protrusion 3 |       | 1.7          | 9.8          |      |
| 18           | C1G18 | Protrusion 1 | 2.7          | 13   |
|              |       | Protrusion 2 | 3.3          | 12   |
|              | C2G18 | Protrusion 1 | 3.7          | 14.3 |
|              |       | Protrusion 2 | 3.9          | 15.5 |
| 19           | C1G19 | Protrusion 1 | 7.6          | 30.9 |
|              |       | Protrusion 2 | 1.9          | 16.2 |
|              |       | Protrusion 3 | 4.7          | 32.7 |
|              | C2G19 | Protrusion 1 | 5.1          | 29.5 |
|              | 20    | C1G20        | Protrusion 1 | 2.1  |
| C2G20        |       | Protrusion 1 | 4.3          | 27.1 |
|              |       | Protrusion 2 | 4            | 27.4 |
| 21           | C1G21 | Protrusion 1 | 2            | 16.5 |
|              |       | Protrusion 2 | 1.5          | 12.6 |
|              | C2G21 | Protrusion 1 | 1.8          | 18.6 |
|              |       | Protrusion 2 | 2.2          | 11   |
| 22           | C1G22 | Protrusion 1 | 7.8          | 28   |
|              | C2G22 | Protrusion 1 | 2.7          | 15.9 |
| 23           | C1G23 | Protrusion 1 | 5.4          | 39.4 |
|              |       | Protrusion 2 | 7.3          | 31.6 |
|              | C2G23 | Protrusion 1 | 2.5          | 18.5 |
|              |       | Protrusion 2 | 3.1          | 18   |
| 24           | C1G24 | Protrusion 1 | 1.2          | 15.8 |
|              |       | Protrusion 2 | 2.5          | 18.4 |
|              |       | Protrusion 3 | 2.1          | 20.7 |
|              | C2G24 | Protrusion 1 | 1.5          | 13.4 |
|              |       | Protrusion 2 | 3.6          | 27.6 |
| 25           | C1G25 | Protrusion 1 | 1.6          | 14   |
|              |       | Protrusion 2 | 2.2          | 21.5 |
|              | C2G25 | Protrusion 1 | 2.3          | 17.8 |
|              |       | Protrusion 2 | 2.3          | 12.3 |
| 26           | C1G26 | Protrusion 1 | 1.4          | 11.5 |
|              |       | Protrusion 2 | 1            | 13.4 |
|              |       | Protrusion 3 | 1            | 11.4 |
|              |       | Protrusion 4 | 3.1          | 33.9 |
|              | C2G26 | Protrusion 1 | 1.5          | 9.6  |
|              |       | Protrusion 2 | 1.4          | 14   |
| 27           | C1G27 | Protrusion 1 | 2.3          | 14.3 |
|              |       | Protrusion 2 | 5.7          | 40.7 |
|              | C2G27 | Protrusion 1 | 2            | 14.7 |
|              |       | Protrusion 2 | 1.9          | 13.9 |
